# Supplementary material for: Association of dairy intake with all-cause, cancer, and cardiovascular disease mortality in Japanese adults: a 25-year population-based cohort
Source: PubMed Central journal article supplement (PMC8921048; doi:10.1007/s00394-021-02734-6), 2021-11-08
Supplement: 394_2021_2734_MOESM1_ESM.pdf [file 394_2021_2734_MOESM1_ESM.pdf]

e-Table 1. Association between total dairy intake and sub outcomes among Men (n=16,565)<sup>a</sup>

|                                | Quartile of total dairy intake <sup>β</sup> |                  |                  |                             | P-trend <sup>γ</sup> |
|--------------------------------|---------------------------------------------|------------------|------------------|-----------------------------|----------------------|
|                                | Q1                                          | Q2               | Q3               | Q4                          |                      |
| <b>CVD mortality</b>           |                                             |                  |                  |                             |                      |
| CHD <sup>δ</sup>               | 1.00 ( <i>ref.</i> )                        | 0.79 (0.55-1.14) | 1.10 (0.78-1.55) | 0.85 (0.60-1.20)            | 0.791                |
| Stroke <sup>δ</sup>            | 1.00 ( <i>ref.</i> )                        | 0.89 (0.68-1.17) | 0.84 (0.63-1.11) | 0.97 (0.75-1.25)            | 0.619                |
| <b>Cancer mortality</b>        |                                             |                  |                  |                             |                      |
| Lung cancer <sup>δ</sup>       | 1.00 ( <i>ref.</i> )                        | 0.94 (0.71-1.24) | 0.90 (0.68-1.21) | 0.79 (0.59-1.05)            | 0.148                |
| Gastric cancer <sup>δ</sup>    | 1.00 ( <i>ref.</i> )                        | 1.09 (0.79-1.51) | 1.07 (0.77-1.50) | 0.90 (0.65-1.25)            | 0.583                |
| Colorectal cancer <sup>δ</sup> | 1.00 ( <i>ref.</i> )                        | 0.74 (0.47-1.17) | 0.79 (0.50-1.26) | 1.07 (0.71-1.60)            | 0.751                |
|                                | Milk intake frequency                       |                  |                  |                             |                      |
|                                | Almost never/<br>1-2 times/mo               | 1-2 times/wk     | 3-4 times/wk     | Almost daily                |                      |
| <b>CVD mortality</b>           |                                             |                  |                  |                             |                      |
| CHD <sup>δ</sup>               | 1.00 ( <i>ref.</i> )                        | 0.82 (0.54-1.26) | 0.73 (0.47-1.14) | 1.07 (0.78-1.43)            | 0.588                |
| Stroke <sup>δ</sup>            | 1.00 ( <i>ref.</i> )                        | 0.95 (0.70-1.28) | 0.93 (0.69-1.27) | 0.93 (0.74-1.18)            | 0.585                |
| <b>Cancer mortality</b>        |                                             |                  |                  |                             |                      |
| Lung cancer <sup>δ</sup>       | 1.00 ( <i>ref.</i> )                        | 0.94 (0.69-1.29) | 0.93 (0.68-1.28) | 0.84 (0.65-1.08)            | 0.168                |
| Gastric cancer <sup>δ</sup>    | 1.00 ( <i>ref.</i> )                        | 1.14 (0.79-1.63) | 1.04 (0.72-1.51) | 0.94 (0.70-1.26)            | 0.531                |
| Colorectal cancer <sup>δ</sup> | 1.00 ( <i>ref.</i> )                        | 0.74 (0.44-1.24) | 0.61 (0.35-1.07) | 1.04 (0.72-1.51)            | 0.663                |
|                                | Yogurt intake frequency                     |                  |                  |                             |                      |
|                                | Almost never                                | 1-2 times/mo     | 1-2 times/wk     | 3 times/wk/<br>Almost daily |                      |
| <b>CVD mortality</b>           |                                             |                  |                  |                             |                      |
| CHD <sup>δ</sup>               | 1.00 ( <i>ref.</i> )                        | 0.77 (0.56-1.07) | 0.61 (0.38-0.98) | 0.86 (0.51-1.42)            | 0.062                |
| Stroke <sup>δ</sup>            | 1.00 ( <i>ref.</i> )                        | 0.93 (0.72-1.18) | 1.06 (0.79-1.44) | 1.24 (0.88-1.75)            | 0.333                |
| <b>Cancer mortality</b>        |                                             |                  |                  |                             |                      |
| Lung cancer <sup>δ</sup>       | 1.00 ( <i>ref.</i> )                        | 0.81 (0.62-1.06) | 0.98 (0.70-1.37) | 1.02 (0.68-1.53)            | 0.753                |
| Gastric cancer <sup>δ</sup>    | 1.00 ( <i>ref.</i> )                        | 0.77 (0.57-1.04) | 0.77 (0.52-1.15) | 1.13 (0.74-1.71)            | 0.557                |
| Colorectal cancer <sup>δ</sup> | 1.00 ( <i>ref.</i> )                        | 0.71 (0.47-1.06) | 0.88 (0.54-1.45) | 0.50 (0.23-1.07)            | 0.058                |
|                                | Cheese intake frequency                     |                  |                  |                             |                      |
|                                | Almost never                                | 1-2 times/mo     | 1-2 times/wk     | 3 times/wk/<br>Almost daily |                      |
| <b>CVD mortality</b>           |                                             |                  |                  |                             |                      |
| CHD <sup>δ</sup>               | 1.00 ( <i>ref.</i> )                        | 0.77 (0.57-1.03) | 0.96 (0.64-1.43) | 1.30 (0.77-2.20)            | 0.961                |
| Stroke <sup>δ</sup>            | 1.00 ( <i>ref.</i> )                        | 0.97 (0.79-1.19) | 0.83 (0.60-1.14) | 0.83 (0.51-1.37)            | 0.233                |
| <b>Cancer mortality</b>        |                                             |                  |                  |                             |                      |
| Lung cancer <sup>δ</sup>       | 1.00 ( <i>ref.</i> )                        | 0.89 (0.70-1.13) | 1.23 (0.91-1.67) | 1.45 (0.94-2.26)            | 0.126                |
| Gastric cancer <sup>δ</sup>    | 1.00 ( <i>ref.</i> )                        | 0.89 (0.68-1.15) | 0.85 (0.58-1.24) | 1.17 (0.71-1.95)            | 0.734                |
| Colorectal cancer <sup>δ</sup> | 1.00 ( <i>ref.</i> )                        | 0.91 (0.64-1.30) | 1.49 (0.97-2.28) | 1.01 (0.46-2.21)            | 0.308                |

---

<sup>a</sup>Hazard ratios (HRs) and 95% confidence intervals (95% CIs) were calculated by Cox proportional hazards models.

<sup>b</sup>Ranges for the quartiles of total dairy intake were 0-40.8 g/d, 44.9-109.8 g/d, 110.8-210.0 g/d, and 211.0-325.0 g/d in men.

<sup>c</sup>*P*-trend was calculated using the median value of each category of total dairy intake and calculated by treating exposure as a continuous variable for subgroup dairy products frequency.

<sup>d</sup>Adjusted for age (continuous), education level (junior high school or lower, high school, college or higher, or missing), BMI (<18.5 kg/m<sup>2</sup>, 18.5-24.9 kg/m<sup>2</sup>, ≥25.0 kg/m<sup>2</sup>, or missing), smoking status (never, former, <20 cigarettes/d, ≥20 cigarettes/d, or missing), alcohol drinking status (current, never, former, or missing), history of hypertension (yes, or no), history of diabetes (yes, or no), energy intake (sex-specific tertiles or missing), fish intake (sex-specific tertiles or missing), and vegetable and fruit intake (sex-specific tertiles or missing).

e-Table 2. Association between total dairy intake and sub outcomes among Women (n=17,596)<sup>a</sup>

|                                | Quartile of total dairy intake <sup>β</sup> |                  |                  |                             | P-trend <sup>γ</sup> |
|--------------------------------|---------------------------------------------|------------------|------------------|-----------------------------|----------------------|
|                                | Q1                                          | Q2               | Q3               | Q4                          |                      |
| <b>CVD mortality</b>           |                                             |                  |                  |                             |                      |
| CHD <sup>δ</sup>               | 1.00 (ref.)                                 | 1.37 (0.87-2.17) | 0.95 (0.59-1.53) | 0.74 (0.43-1.27)            | 0.303                |
| Stroke <sup>δ</sup>            | 1.00 (ref.)                                 | 0.95 (0.66-1.35) | 1.14 (0.83-1.56) | 1.05 (0.75-1.47)            | 0.460                |
| <b>Cancer mortality</b>        |                                             |                  |                  |                             |                      |
| Lung cancer <sup>δ</sup>       | 1.00 (ref.)                                 | 0.80 (0.47-1.37) | 0.82 (0.50-1.34) | 0.71 (0.42-1.20)            | 0.252                |
| Gastric cancer <sup>δ</sup>    | 1.00 (ref.)                                 | 0.81 (0.44-1.52) | 0.94 (0.53-1.66) | 1.37 (0.79-2.37)            | 0.426                |
| Colorectal cancer <sup>δ</sup> | 1.00 (ref.)                                 | 0.61 (0.34-1.08) | 0.74 (0.45-1.23) | 0.98 (0.60-1.61)            | 0.696                |
|                                | Milk intake frequency                       |                  |                  |                             |                      |
|                                | Almost never/<br>1-2 times/mo               | 1-2 times/wk     | 3-4 times/wk     | Almost daily                |                      |
| <b>CVD mortality</b>           |                                             |                  |                  |                             |                      |
| CHD <sup>δ</sup>               | 1.00 (ref.)                                 | 1.26 (0.70-2.25) | 1.57 (0.92-2.67) | 0.91 (0.57-1.45)            | 0.568                |
| Stroke <sup>δ</sup>            | 1.00 (ref.)                                 | 1.07 (0.69-1.66) | 1.10 (0.73-1.65) | 1.15 (0.83-1.58)            | 0.272                |
| <b>Cancer mortality</b>        |                                             |                  |                  |                             |                      |
| Lung cancer <sup>δ</sup>       | 1.00 (ref.)                                 | 1.33 (0.72-2.47) | 0.78 (0.40-1.51) | 0.85 (0.52-1.39)            | 0.291                |
| Gastric cancer <sup>δ</sup>    | 1.00 (ref.)                                 | 0.78 (0.35-1.72) | 0.89 (0.44-1.72) | 1.13 (0.66-1.91)            | 0.482                |
| Colorectal cancer <sup>δ</sup> | 1.00 (ref.)                                 | 0.49 (0.23-1.03) | 0.57 (0.30-1.09) | 0.77 (0.49-1.19)            | 0.444                |
|                                | Yogurt intake frequency                     |                  |                  |                             |                      |
|                                | Almost never                                | 1-2 times/mo     | 1-2 times/wk     | 3 times/wk/<br>Almost daily |                      |
| <b>CVD mortality</b>           |                                             |                  |                  |                             |                      |
| CHD <sup>δ</sup>               | 1.00 (ref.)                                 | 1.23 (0.81-1.85) | 0.72 (0.43-1.20) | 0.71 (0.39-1.27)            | 0.125                |
| Stroke <sup>δ</sup>            | 1.00 (ref.)                                 | 0.92 (0.68-1.24) | 0.98 (0.72-1.34) | 1.03 (0.73-1.46)            | 0.882                |
| <b>Cancer mortality</b>        |                                             |                  |                  |                             |                      |
| Lung cancer <sup>δ</sup>       | 1.00 (ref.)                                 | 1.10 (0.69-1.75) | 0.97 (0.58-1.60) | 0.92 (0.52-1.61)            | 0.737                |
| Gastric cancer <sup>δ</sup>    | 1.00 (ref.)                                 | 0.78 (0.45-1.35) | 1.05 (0.61-1.78) | 1.20 (0.68-2.12)            | 0.495                |
| Colorectal cancer <sup>δ</sup> | 1.00 (ref.)                                 | 1.29 (0.79-2.11) | 1.63 (0.99-2.66) | 1.32 (0.75-2.32)            | 0.149                |
|                                | Cheese intake frequency                     |                  |                  |                             |                      |
|                                | Almost never                                | 1-2 times/mo     | 1-2 times/wk     | 3 times/wk/<br>Almost daily |                      |
| <b>CVD mortality</b>           |                                             |                  |                  |                             |                      |
| CHD <sup>δ</sup>               | 1.00 (ref.)                                 | 0.95 (0.63-1.42) | 0.79 (0.44-1.41) | 0.71 (0.28-1.78)            | 0.323                |
| Stroke <sup>δ</sup>            | 1.00 (ref.)                                 | 0.87 (0.65-1.15) | 1.05 (0.74-1.49) | 0.96 (0.57-1.61)            | 0.899                |
| <b>Cancer mortality</b>        |                                             |                  |                  |                             |                      |
| Lung cancer <sup>δ</sup>       | 1.00 (ref.)                                 | 0.98 (0.64-1.51) | 1.16 (0.69-1.96) | 0.64 (0.25-1.62)            | 0.766                |
| Gastric cancer <sup>δ</sup>    | 1.00 (ref.)                                 | 1.32 (0.83-2.09) | 1.63 (0.94-2.83) | 0.44 (0.11-1.85)            | 0.538                |
| Colorectal cancer <sup>δ</sup> | 1.00 (ref.)                                 | 1.04 (0.68-1.59) | 0.78 (0.42-1.44) | 0.88 (0.37-2.06)            | 0.543                |

---

<sup>α</sup>Hazard ratios (HRs) and 95% confidence intervals (95% CIs) were calculated by Cox proportional hazards models.

<sup>β</sup>Ranges for the quartiles of total dairy intake were 0-49.4 g/d, 49.9-205.0 g/d, 210.0-224.5 g/d, and 229.3-310.0 g/d in women.

<sup>γ</sup>*P*-trend was calculated using the median value of each category of total dairy intake and calculated by treating exposure as a continuous variable for subgroup dairy products frequency.

<sup>δ</sup>Adjusted for age (continuous), education level (junior high school or lower, high school, college or higher, or missing), BMI (<18.5 kg/m<sup>2</sup>, 18.5-24.9 kg/m<sup>2</sup>, ≥25.0 kg/m<sup>2</sup>, or missing), smoking status (never, former, <20 cigarettes/d, ≥20 cigarettes/d, or missing), alcohol drinking status (current, never, former, or missing), history of hypertension (yes, or no), history of diabetes (yes, or no), energy intake (sex-specific tertiles or missing), fish intake (sex-specific tertiles or missing), and vegetable and fruit intake (sex-specific tertiles or missing).

e-Table 3. Association between total dairy intake and mortality after excluding death ascertained in the initial three years among Men (n=16,410)<sup>a</sup>

|                                  | Quartile of total dairy intake |                  |                  |                             | <i>P</i> -trend <sup>β</sup> |
|----------------------------------|--------------------------------|------------------|------------------|-----------------------------|------------------------------|
|                                  | Q1                             | Q2               | Q3               | Q4                          |                              |
| All-cause mortality <sup>γ</sup> | 1.00 ( <i>ref.</i> )           | 0.94 (0.86-1.03) | 1.00 (0.91-1.09) | 0.94 (0.86-1.02)            | 0.654                        |
| Cancer mortality <sup>γ</sup>    | 1.00 ( <i>ref.</i> )           | 0.98 (0.85-1.12) | 0.97 (0.84-1.12) | 0.92 (0.81-1.06)            | 0.332                        |
| CVD mortality <sup>γ</sup>       | 1.00 ( <i>ref.</i> )           | 0.89 (0.74-1.06) | 1.01 (0.84-1.21) | 0.96 (0.81-1.14)            | 0.724                        |
|                                  | Milk intake frequency          |                  |                  |                             |                              |
|                                  | Almost never/<br>1-2 times/mo  | 1-2 times/wk     | 3-4 times/wk     | Almost daily                |                              |
| All-cause mortality <sup>γ</sup> | 1.00 ( <i>ref.</i> )           | 0.96 (0.87-1.06) | 0.93 (0.84-1.03) | 0.98 (0.91-1.06)            | 0.634                        |
| Cancer mortality <sup>γ</sup>    | 1.00 ( <i>ref.</i> )           | 0.96 (0.82-1.12) | 1.02 (0.88-1.19) | 0.93 (0.82-1.05)            | 0.292                        |
| CVD mortality <sup>γ</sup>       | 1.00 ( <i>ref.</i> )           | 0.90 (0.73-1.12) | 0.93 (0.76-1.15) | 1.03 (0.88-1.20)            | 0.548                        |
|                                  | Yogurt intake frequency        |                  |                  |                             |                              |
|                                  | Almost never                   | 1-2 times/mo     | 1-2 times/wk     | 3 times/wk/<br>Almost daily |                              |
| All-cause mortality <sup>γ</sup> | 1.00 ( <i>ref.</i> )           | 0.91 (0.84-0.98) | 0.90 (0.81-1.00) | 1.05 (0.93-1.18)            | 0.325                        |
| Cancer mortality <sup>γ</sup>    | 1.00 ( <i>ref.</i> )           | 0.91 (0.80-1.03) | 0.96 (0.82-1.13) | 1.05 (0.86-1.27)            | 0.807                        |
| CVD mortality <sup>γ</sup>       | 1.00 ( <i>ref.</i> )           | 0.95 (0.81-1.11) | 0.93 (0.76-1.14) | 0.96 (0.75-1.23)            | 0.469                        |
|                                  | Cheese intake frequency        |                  |                  |                             |                              |
|                                  | Almost never                   | 1-2 times/mo     | 1-2 times/wk     | 3 times/wk/<br>Almost daily |                              |
| All-cause mortality <sup>γ</sup> | 1.00 ( <i>ref.</i> )           | 0.90 (0.84-0.97) | 0.96 (0.87-1.06) | 1.08 (0.93-1.25)            | 0.603                        |
| Cancer mortality <sup>γ</sup>    | 1.00 ( <i>ref.</i> )           | 1.01 (0.91-1.13) | 1.13 (0.98-1.32) | 1.10 (0.87-1.40)            | 0.139                        |
| CVD mortality <sup>γ</sup>       | 1.00 ( <i>ref.</i> )           | 0.85 (0.74-0.98) | 0.88 (0.72-1.09) | 1.05 (0.78-1.41)            | 0.292                        |

---

<sup>α</sup>Hazard ratios (HRs) and 95% confidence intervals (95% CIs) were calculated by Cox proportional hazards models.

<sup>β</sup>Ranges for the quartiles of total dairy intake were 0-40.8 g/d, 44.9-109.8 g/d, 110.8-210.0 g/d, and 211.0-325.0 g/d in men.

<sup>γ</sup>*P*-trend was calculated using the median value of each category of total dairy intake and calculated by treating exposure as a continuous variable for subgroup dairy products frequency.

<sup>δ</sup>Adjusted for age (continuous), education level (junior high school or lower, high school, college or higher, or missing), BMI (<18.5 kg/m<sup>2</sup>, 18.5-24.9 kg/m<sup>2</sup>, ≥25.0 kg/m<sup>2</sup>, or missing), smoking status (never, former, <20 cigarettes/d, ≥20 cigarettes/d, or missing), alcohol drinking status (current, never, former, or missing), history of hypertension (yes, or no), history of diabetes (yes, or no), energy intake (sex-specific tertiles or missing), protein intake (sex-specific tertiles or missing), fish intake (sex-specific tertiles or missing), and vegetable and fruit intake (sex-specific tertiles or missing).

e-Table 4. Association between total dairy intake and mortality after excluding death ascertained in the initial three years among Women (n=17,513)<sup>a</sup>

|                                  | Quartile of total dairy intake |                  |                  |                             | <i>P</i> -trend <sup>β</sup> |
|----------------------------------|--------------------------------|------------------|------------------|-----------------------------|------------------------------|
|                                  | Q1                             | Q2               | Q3               | Q4                          |                              |
| All-cause mortality <sup>γ</sup> | 1.00 ( <i>ref.</i> )           | 0.97 (0.86-1.09) | 1.04 (0.93-1.16) | 0.98 (0.87-1.10)            | 0.752                        |
| Cancer mortality <sup>γ</sup>    | 1.00 ( <i>ref.</i> )           | 0.85 (0.69-1.05) | 0.97 (0.80-1.17) | 1.00 (0.82-1.22)            | 0.896                        |
| CVD mortality <sup>γ</sup>       | 1.00 ( <i>ref.</i> )           | 1.01 (0.80-1.27) | 1.03 (0.83-1.27) | 0.92 (0.73-1.16)            | 0.769                        |
|                                  | Milk intake frequency          |                  |                  |                             |                              |
|                                  | Almost never/<br>1-2 times/mo  | 1-2 times/wk     | 3-4 times/wk     | Almost daily                |                              |
| All-cause mortality <sup>γ</sup> | 1.00 ( <i>ref.</i> )           | 1.01 (0.87-1.16) | 0.95 (0.83-1.09) | 1.01 (0.91-1.13)            | 0.831                        |
| Cancer mortality <sup>γ</sup>    | 1.00 ( <i>ref.</i> )           | 0.94 (0.73-1.21) | 0.84 (0.65-1.07) | 0.98 (0.82-1.18)            | 0.955                        |
| CVD mortality <sup>γ</sup>       | 1.00 ( <i>ref.</i> )           | 1.13 (0.85-1.50) | 1.04 (0.79-1.37) | 1.02 (0.83-1.26)            | 0.957                        |
|                                  | Yogurt intake frequency        |                  |                  |                             |                              |
|                                  | Almost never                   | 1-2 times/mo     | 1-2 times/wk     | 3 times/wk/<br>Almost daily |                              |
| All-cause mortality <sup>γ</sup> | 1.00 ( <i>ref.</i> )           | 0.91 (0.82-1.01) | 0.93 (0.84-1.04) | 0.91 (0.80-1.03)            | 0.105                        |
| Cancer mortality <sup>γ</sup>    | 1.00 ( <i>ref.</i> )           | 0.96 (0.80-1.15) | 0.96 (0.79-1.16) | 1.09 (0.88-1.33)            | 0.633                        |
| CVD mortality <sup>γ</sup>       | 1.00 ( <i>ref.</i> )           | 0.90 (0.74-1.11) | 0.90 (0.72-1.11) | 0.86 (0.67-1.10)            | 0.185                        |
|                                  | Cheese intake frequency        |                  |                  |                             |                              |
|                                  | Almost never                   | 1-2 times/mo     | 1-2 times/wk     | 3 times/wk/<br>Almost daily |                              |
| All-cause mortality <sup>γ</sup> | 1.00 ( <i>ref.</i> )           | 0.89 (0.81-0.97) | 0.88 (0.78-1.00) | 0.87 (0.72-1.05)            | 0.011                        |
| Cancer mortality <sup>γ</sup>    | 1.00 ( <i>ref.</i> )           | 0.95 (0.80-1.12) | 1.04 (0.84-1.28) | 0.92 (0.67-1.28)            | 0.833                        |
| CVD mortality <sup>γ</sup>       | 1.00 ( <i>ref.</i> )           | 0.89 (0.73-1.07) | 0.94 (0.74-1.21) | 0.98 (0.68-1.39)            | 0.556                        |

---

<sup>α</sup>Hazard ratios (HRs) and 95% confidence intervals (95% CIs) were calculated by Cox proportional hazards models.

<sup>β</sup>Ranges for the quartiles of total dairy intake were 0-49.4 g/d, 49.9-205.0 g/d, 210.0-224.5 g/d, and 229.3-310.0 g/d in women.

<sup>γ</sup>*P*-trend was calculated using the median value of each category of total dairy intake and calculated by treating exposure as a continuous variable for subgroup dairy products frequency.

<sup>δ</sup>Adjusted for age (continuous), education level (junior high school or lower, high school, college or higher, or missing), BMI (<18.5 kg/m<sup>2</sup>, 18.5-24.9 kg/m<sup>2</sup>, ≥25.0 kg/m<sup>2</sup>, or missing), smoking status (never, former, <20 cigarettes/d, ≥20 cigarettes/d, or missing), alcohol drinking status (current, never, former, or missing), history of hypertension (yes, or no), history of diabetes (yes, or no), energy intake (sex-specific tertiles or missing), protein intake (sex-specific tertiles or missing), fish intake (sex-specific tertiles or missing), and vegetable and fruit intake (sex-specific tertiles or missing).



e-Table 5. Association between total dairy intake and mortality in stratified analysis (n=34,161).

|                            |                                  | Quartile of total dairy intake |                  |                  |                  | <i>P</i> -trend <sup>β</sup> | <i>P</i> -interaction <sup>γ</sup> |
|----------------------------|----------------------------------|--------------------------------|------------------|------------------|------------------|------------------------------|------------------------------------|
|                            |                                  | Q1                             | Q2               | Q3               | Q4               |                              |                                    |
| <b>Men</b>                 |                                  |                                |                  |                  |                  |                              |                                    |
| <b>All-cause mortality</b> |                                  |                                |                  |                  |                  |                              |                                    |
| Age                        | <50 y (n=8,116)                  | 1.00 ( <i>ref.</i> )           | 0.91 (0.77-1.08) | 0.91 (0.75-1.09) | 0.93 (0.79-1.11) | 0.470                        | 0.778                              |
|                            | ≥50 y (n=8,449)                  | 1.00 ( <i>ref.</i> )           | 0.94 (0.85-1.04) | 1.02 (0.92-1.12) | 0.92 (0.84-1.01) | 0.618                        |                                    |
| BMI                        | <25 kg/m <sup>2</sup> (n=11,598) | 1.00 ( <i>ref.</i> )           | 0.95 (0.86-1.05) | 1.05 (0.94-1.16) | 0.97 (0.88-1.07) | 0.587                        | 0.035                              |
|                            | ≥25 kg/m <sup>2</sup> (n=4,483)  | 1.00 ( <i>ref.</i> )           | 0.93 (0.79-1.10) | 0.87 (0.73-1.04) | 0.83 (0.70-0.98) | 0.024                        |                                    |
| Currently smoking          | No (n=6,310)                     | 1.00 ( <i>ref.</i> )           | 1.05 (0.90-1.23) | 0.99 (0.84-1.17) | 0.90 (0.77-1.05) | 0.119                        | 0.402                              |
|                            | Yes (n=9,989)                    | 1.00 ( <i>ref.</i> )           | 0.91 (0.82-1.01) | 0.98 (0.88-1.09) | 0.94 (0.85-1.04) | 0.819                        |                                    |
| <b>Cancer mortality</b>    |                                  |                                |                  |                  |                  |                              |                                    |
| Age                        | <50 y (n=8,116)                  | 1.00 ( <i>ref.</i> )           | 0.88 (0.68-1.15) | 0.92 (0.69-1.24) | 0.87 (0.67-1.15) | 0.527                        | 0.763                              |
|                            | ≥50 y (n=8,449)                  | 1.00 ( <i>ref.</i> )           | 1.02 (0.87-1.19) | 0.99 (0.84-1.16) | 0.94 (0.80-1.09) | 0.270                        |                                    |
| BMI                        | <25 kg/m <sup>2</sup> (n=11,598) | 1.00 ( <i>ref.</i> )           | 1.02 (0.87-1.20) | 1.02 (0.87-1.21) | 0.98 (0.84-1.15) | 0.405                        | 0.131                              |
|                            | ≥25 kg/m <sup>2</sup> (n=4,483)  | 1.00 ( <i>ref.</i> )           | 0.93 (0.71-1.21) | 0.83 (0.63-1.11) | 0.75 (0.57-0.99) | 0.039                        |                                    |
| Currently smoking          | No (n=6,310)                     | 1.00 ( <i>ref.</i> )           | 1.18 (0.91-1.54) | 1.05 (0.80-1.38) | 0.94 (0.73-1.21) | 0.338                        | 0.944                              |
|                            | Yes (n=9,989)                    | 1.00 ( <i>ref.</i> )           | 0.93 (0.79-1.09) | 0.93 (0.79-1.10) | 0.92 (0.78-1.08) | 0.401                        |                                    |
| <b>CVD mortality</b>       |                                  |                                |                  |                  |                  |                              |                                    |
| Age                        | <50 y (n=8,116)                  | 1.00 ( <i>ref.</i> )           | 0.76 (0.53-1.08) | 0.71 (0.47-1.06) | 0.91 (0.65-1.29) | 0.549                        | 0.538                              |
|                            | ≥50 y (n=8,449)                  | 1.00 ( <i>ref.</i> )           | 0.91 (0.74-1.12) | 1.09 (0.89-1.32) | 0.94 (0.78-1.15) | 0.656                        |                                    |
| BMI                        | <25 kg/m <sup>2</sup> (n=11,598) | 1.00 ( <i>ref.</i> )           | 0.92 (0.74-1.14) | 1.09 (0.88-1.36) | 0.96 (0.78-1.18) | 0.551                        | 0.631                              |
|                            | ≥25 kg/m <sup>2</sup> (n=4,483)  | 1.00 ( <i>ref.</i> )           | 0.81 (0.58-1.13) | 0.82 (0.58-1.15) | 0.94 (0.69-1.29) | 0.766                        |                                    |
| Currently smoking          | No (n=6,310)                     | 1.00 ( <i>ref.</i> )           | 0.97 (0.70-1.34) | 0.86 (0.62-1.20) | 0.88 (0.65-1.19) | 0.287                        | 0.570                              |
|                            | Yes (n=9,989)                    | 1.00 ( <i>ref.</i> )           | 0.84 (0.67-1.03) | 1.03 (0.83-1.27) | 0.96 (0.78-1.18) | 0.520                        |                                    |
| <b>Women</b>               |                                  |                                |                  |                  |                  |                              |                                    |
| <b>All-cause mortality</b> |                                  |                                |                  |                  |                  |                              |                                    |
| Age                        | <50 y (n=7,942)                  | 1.00 ( <i>ref.</i> )           | 1.22 (0.96-1.54) | 1.09 (0.84-1.41) | 1.13 (0.88-1.46) | 0.536                        | 0.789                              |
|                            | ≥50 y (n=9,654)                  | 1.00 ( <i>ref.</i> )           | 0.87 (0.76-1.00) | 1.08 (0.96-1.21) | 0.97 (0.85-1.10) | 0.376                        |                                    |
| BMI                        | <25 kg/m <sup>2</sup> (n=12,000) | 1.00 ( <i>ref.</i> )           | 0.96 (0.83-1.12) | 1.06 (0.93-1.22) | 1.01 (0.87-1.16) | 0.474                        | 0.551                              |
|                            | ≥25 kg/m <sup>2</sup> (n=5,122)  | 1.00 ( <i>ref.</i> )           | 0.98 (0.81-1.19) | 0.99 (0.83-1.19) | 0.95 (0.78-1.16) | 0.736                        |                                    |
| Currently smoking          | No (n=13,629)                    | 1.00 ( <i>ref.</i> )           | 0.93 (0.81-1.07) | 0.98 (0.87-1.12) | 0.93 (0.81-1.06) | 0.510                        | 0.095                              |
|                            | Yes (n=1,195)                    | 1.00 ( <i>ref.</i> )           | 1.39 (0.95-2.05) | 1.35 (0.92-1.98) | 1.33 (0.88-2.00) | 0.116                        |                                    |
| <b>Cancer mortality</b>    |                                  |                                |                  |                  |                  |                              |                                    |
| Age                        | <50 y (n=7,942)                  | 1.00 ( <i>ref.</i> )           | 1.23 (0.85-1.78) | 0.87 (0.57-1.33) | 0.91 (0.60-1.38) | 0.352                        | 0.128                              |
|                            | ≥50 y (n=9,654)                  | 1.00 ( <i>ref.</i> )           | 0.68 (0.53-0.88) | 1.02 (0.83-1.25) | 1.02 (0.82-1.28) | 0.341                        |                                    |
| BMI                        | <25 kg/m <sup>2</sup> (n=12,000) | 1.00 ( <i>ref.</i> )           | 0.82 (0.63-1.07) | 1.13 (0.89-1.43) | 1.08 (0.85-1.38) | 0.163                        | 0.061                              |
|                            | ≥25 kg/m <sup>2</sup> (n=5,122)  | 1.00 ( <i>ref.</i> )           | 0.88 (0.63-1.23) | 0.71 (0.51-0.99) | 0.86 (0.61-1.20) | 0.082                        |                                    |
| Currently smoking          | No (n=13,629)                    | 1.00 ( <i>ref.</i> )           | 0.84 (0.66-1.06) | 0.90 (0.72-1.12) | 0.99 (0.79-1.24) | 0.748                        | 0.562                              |
|                            | Yes (n=1,195)                    | 1.00 ( <i>ref.</i> )           | 1.02 (0.48-2.15) | 1.29 (0.65-2.56) | 1.23 (0.58-2.59) | 0.433                        |                                    |

**CVD mortality**

|                   |                                  |                      |                  |                  |                  |       |       |
|-------------------|----------------------------------|----------------------|------------------|------------------|------------------|-------|-------|
| Age               | <50 y (n=7,942)                  | 1.00 ( <i>ref.</i> ) | 1.12 (0.63-2.00) | 1.13 (0.62-2.06) | 1.59 (0.91-2.77) | 0.169 | 0.090 |
|                   | ≥50 y (n=9,654)                  | 1.00 ( <i>ref.</i> ) | 0.97 (0.75-1.25) | 1.10 (0.88-1.38) | 0.85 (0.66-1.10) | 0.852 |       |
| BMI               | <25 kg/m <sup>2</sup> (n=12,000) | 1.00 ( <i>ref.</i> ) | 1.14 (0.84-1.54) | 1.09 (0.82-1.44) | 1.02 (0.75-1.38) | 0.834 | 0.648 |
|                   | ≥25 kg/m <sup>2</sup> (n=5,122)  | 1.00 ( <i>ref.</i> ) | 0.86 (0.59-1.25) | 0.99 (0.71-1.38) | 0.85 (0.58-1.24) | 0.689 |       |
| Currently smoking | No (n=13,629)                    | 1.00 ( <i>ref.</i> ) | 0.96 (0.73-1.27) | 1.01 (0.79-1.31) | 0.90 (0.68-1.19) | 0.742 | 0.172 |
|                   | Yes (n=1,195)                    | 1.00 ( <i>ref.</i> ) | 1.86 (0.91-3.82) | 1.87 (0.92-3.78) | 1.19 (0.53-2.69) | 0.293 |       |

<sup>a</sup>Hazard ratios (HRs) and 95% confidence intervals (95% CIs) were calculated by Cox proportional hazards models.

<sup>β</sup> *P*-trend was calculated as per 100g/d increment of total dairy intake.

<sup>γ</sup>Adjusted for age (continuous), education level (junior high school or lower, high school, college or higher, or missing), BMI (<18.5kg/m<sup>2</sup>, 18.5-24.9 kg/m<sup>2</sup>, ≥25.0kg/m<sup>2</sup>, or missing), smoking status (never, former, <20 cigarettes/d, ≥20 cigarettes/d, or missing), alcohol drinking status (current, never, former, or missing), history of hypertension (yes, or no), history of diabetes (yes, or no), energy intake (sex-specific tertiles or missing), fish intake (sex-specific tertiles or missing), and vegetable and fruit intake (sex-specific tertiles or missing) except the stratified variable.

e-Table 6. Association between milk intake and mortality in stratified analysis (n=34,161).

|                            |                                  | Milk intake frequency         |                  |                  |                  | <i>P</i> -trend <sup>β</sup> | <i>P</i> -interaction <sup>γ</sup> |
|----------------------------|----------------------------------|-------------------------------|------------------|------------------|------------------|------------------------------|------------------------------------|
|                            |                                  | Almost never/<br>1-2 times/mo | 1-2 times/wk     | 3-4 times/wk     | Almost daily     |                              |                                    |
| <b>Men</b>                 |                                  |                               |                  |                  |                  |                              |                                    |
| <b>All-cause mortality</b> |                                  |                               |                  |                  |                  |                              |                                    |
| Age                        | < y (n=8,116)                    | 1.00 ( <i>ref.</i> )          | 0.85 (0.70-1.03) | 0.91 (0.76-1.10) | 0.95 (0.81-1.11) | 0.768                        | 0.891                              |
|                            | ≥ y (n=8,449)                    | 1.00 ( <i>ref.</i> )          | 1.00 (0.89-1.12) | 0.91 (0.81-1.02) | 0.98 (0.90-1.07) | 0.547                        |                                    |
| BMI                        | <25 kg/m <sup>2</sup> (n=11,598) | 1.00 ( <i>ref.</i> )          | 0.95 (0.85-1.07) | 0.97 (0.86-1.09) | 1.01 (0.92-1.10) | 0.704                        | 0.081                              |
|                            | ≥25 kg/m <sup>2</sup> (n=4,483)  | 1.00 ( <i>ref.</i> )          | 0.99 (0.82-1.19) | 0.84 (0.69-1.02) | 0.88 (0.76-1.03) | 0.061                        |                                    |
| Currently smoking          | No (n=6,310)                     | 1.00 ( <i>ref.</i> )          | 1.18 (0.98-1.40) | 0.93 (0.78-1.12) | 0.93 (0.80-1.07) | 0.059                        | 0.197                              |
|                            | Yes (n=9,989)                    | 1.00 ( <i>ref.</i> )          | 0.88 (0.78-0.99) | 0.92 (0.82-1.04) | 0.98 (0.90-1.08) | 0.969                        |                                    |
| <b>Cancer mortality</b>    |                                  |                               |                  |                  |                  |                              |                                    |
| Age                        | < y (n=8,116)                    | 1.00 ( <i>ref.</i> )          | 0.78 (0.57-1.06) | 0.94 (0.7-1.27)  | 0.91 (0.71-1.16) | 0.677                        | 0.941                              |
|                            | ≥ y (n=8,449)                    | 1.00 ( <i>ref.</i> )          | 1.05 (0.88-1.25) | 1.02 (0.86-1.22) | 0.95 (0.82-1.09) | 0.327                        |                                    |
| BMI                        | <25 kg/m <sup>2</sup> (n=11,598) | 1.00 ( <i>ref.</i> )          | 1.02 (0.85-1.23) | 1.02 (0.85-1.23) | 0.99 (0.86-1.14) | 0.797                        | 0.181                              |
|                            | ≥25 kg/m <sup>2</sup> (n=4,483)  | 1.00 ( <i>ref.</i> )          | 0.91 (0.67-1.23) | 1.01 (0.75-1.35) | 0.78 (0.61-1.00) | 0.060                        |                                    |
| Currently smoking          | No (n=6,310)                     | 1.00 ( <i>ref.</i> )          | 1.35 (1.01-1.80) | 1.21 (0.91-1.61) | 0.93 (0.74-1.18) | 0.175                        | 0.611                              |
|                            | Yes (n=9,989)                    | 1.00 ( <i>ref.</i> )          | 0.86 (0.71-1.03) | 0.95 (0.79-1.14) | 0.93 (0.81-1.07) | 0.507                        |                                    |
| <b>CVD mortality</b>       |                                  |                               |                  |                  |                  |                              |                                    |
| Age                        | < y (n=8,116)                    | 1.00 ( <i>ref.</i> )          | 0.61 (0.40-0.94) | 0.84 (0.57-1.24) | 0.90 (0.65-1.24) | 0.874                        | 0.810                              |
|                            | ≥ y (n=8,449)                    | 1.00 ( <i>ref.</i> )          | 0.99 (0.79-1.25) | 0.93 (0.73-1.17) | 1.05 (0.88-1.25) | 0.584                        |                                    |
| BMI                        | <25 kg/m <sup>2</sup> (n=11,598) | 1.00 ( <i>ref.</i> )          | 0.89 (0.69-1.15) | 1.08 (0.85-1.38) | 1.04 (0.86-1.26) | 0.450                        | 0.689                              |
|                            | ≥25 kg/m <sup>2</sup> (n=4,483)  | 1.00 ( <i>ref.</i> )          | 0.86 (0.59-1.26) | 0.65 (0.44-0.98) | 0.97 (0.73-1.30) | 0.916                        |                                    |
| Currently smoking          | No (n=6,310)                     | 1.00 ( <i>ref.</i> )          | 1.03 (0.71-1.48) | 0.87 (0.60-1.26) | 0.88 (0.67-1.17) | 0.302                        | 0.467                              |
|                            | Yes (n=9,989)                    | 1.00 ( <i>ref.</i> )          | 0.81 (0.63-1.04) | 0.93 (0.73-1.19) | 1.05 (0.87-1.26) | 0.368                        |                                    |
| <b>Women</b>               |                                  |                               |                  |                  |                  |                              |                                    |
| <b>All-cause mortality</b> |                                  |                               |                  |                  |                  |                              |                                    |
| Age                        | <50 y (n=7,942)                  | 1.00 ( <i>ref.</i> )          | 0.97 (0.72-1.31) | 1.24 (0.94-1.64) | 1.07 (0.84-1.36) | 0.451                        | 0.669                              |
|                            | ≥50 y (n=9,654)                  | 1.00 ( <i>ref.</i> )          | 0.97 (0.82-1.14) | 0.84 (0.72-0.98) | 1.03 (0.91-1.15) | 0.545                        |                                    |
| BMI                        | <25 kg/m <sup>2</sup> (n=12,000) | 1.00 ( <i>ref.</i> )          | 0.87 (0.72-1.05) | 0.90 (0.75-1.07) | 0.99 (0.87-1.13) | 0.774                        | 0.975                              |
|                            | ≥25 kg/m <sup>2</sup> (n=5,122)  | 1.00 ( <i>ref.</i> )          | 1.25 (0.99-1.58) | 1.05 (0.84-1.32) | 1.06 (0.88-1.26) | 0.948                        |                                    |
| Currently smoking          | No (n=13,629)                    | 1.00 ( <i>ref.</i> )          | 1.00 (0.84-1.18) | 0.92 (0.78-1.08) | 0.96 (0.85-1.09) | 0.477                        | 0.067                              |
|                            | Yes (n=1,195)                    | 1.00 ( <i>ref.</i> )          | 0.95 (0.59-1.53) | 1.61 (1.02-2.53) | 1.29 (0.91-1.83) | 0.082                        |                                    |
| <b>Cancer mortality</b>    |                                  |                               |                  |                  |                  |                              |                                    |
| Age                        | <50 y (n=7,942)                  | 1.00 ( <i>ref.</i> )          | 1.14 (0.73-1.78) | 1.11 (0.71-1.73) | 0.86 (0.58-1.26) | 0.291                        | 0.127                              |
|                            | ≥50 y (n=9,654)                  | 1.00 ( <i>ref.</i> )          | 0.79 (0.58-1.07) | 0.71 (0.53-0.94) | 1.02 (0.83-1.25) | 0.478                        |                                    |
| BMI                        | <25 kg/m <sup>2</sup> (n=12,000) | 1.00 ( <i>ref.</i> )          | 0.72 (0.51-1.00) | 0.80 (0.59-1.08) | 1.04 (0.83-1.30) | 0.289                        | 0.107                              |
|                            | ≥25 kg/m <sup>2</sup> (n=5,122)  | 1.00 ( <i>ref.</i> )          | 1.30 (0.88-1.90) | 0.87 (0.59-1.31) | 0.84 (0.62-1.15) | 0.098                        |                                    |
| Currently smoking          | No (n=13,629)                    | 1.00 ( <i>ref.</i> )          | 0.97 (0.73-1.28) | 0.85 (0.64-1.11) | 0.96 (0.78-1.18) | 0.684                        | 0.530                              |
|                            | Yes (n=1,195)                    | 1.00 ( <i>ref.</i> )          | 1.34 (0.61-2.99) | 0.90 (0.32-2.51) | 1.34 (0.71-2.53) | 0.443                        |                                    |

**CVD mortality**

|                   |                                  |                      |                  |                  |                  |       |       |
|-------------------|----------------------------------|----------------------|------------------|------------------|------------------|-------|-------|
| Age               | <50 y (n=7,942)                  | 1.00 ( <i>ref.</i> ) | 0.58 (0.25-1.33) | 1.45 (0.77-2.72) | 1.32 (0.77-2.26) | 0.108 | 0.078 |
|                   | ≥50 y (n=9,654)                  | 1.00 ( <i>ref.</i> ) | 1.19 (0.88-1.61) | 0.94 (0.70-1.27) | 1.03 (0.82-1.29) | 0.948 |       |
| BMI               | <25 kg/m <sup>2</sup> (n=12,000) | 1.00 ( <i>ref.</i> ) | 1.12 (0.77-1.62) | 1.14 (0.79-1.63) | 1.06 (0.80-1.41) | 0.774 | 0.777 |
|                   | ≥25 kg/m <sup>2</sup> (n=5,122)  | 1.00 ( <i>ref.</i> ) | 1.12 (0.72-1.75) | 0.96 (0.62-1.49) | 1.01 (0.72-1.41) | 0.918 |       |
| Currently smoking | No (n=13,629)                    | 1.00 ( <i>ref.</i> ) | 0.98 (0.69-1.38) | 1.00 (0.72-1.37) | 0.98 (0.76-1.25) | 0.863 | 0.122 |
|                   | Yes (n=1,195)                    | 1.00 ( <i>ref.</i> ) | 1.29 (0.52-3.16) | 2.44 (1.06-5.60) | 1.58 (0.80-3.11) | 0.161 |       |

<sup>a</sup>Hazard ratios (HRs) and 95% confidence intervals (95% CIs) were calculated by Cox proportional hazards models.

<sup>β</sup> *P*-trend was calculated by treating exposure as a continuous variable.

<sup>γ</sup>Model 1 was adjusted for age (continuous), education level (junior high school or lower, high school, college or higher, or missing), BMI (<18.5 kg/m<sup>2</sup>, 18.5-24.9 kg/m<sup>2</sup>, ≥25.0 kg/m<sup>2</sup>, or missing), smoking status (never, former, <20 cigarettes/d, ≥20 cigarettes/d, or missing), alcohol drinking status (current, never, former, or missing), history of hypertension (yes, or no), history of diabetes (yes, or no), energy intake (sex-specific tertiles or missing), fish intake (sex-specific tertiles or missing), and vegetable and fruit intake (sex-specific tertiles or missing) except the stratified variable.

e-Table 7. Association between yogurt intake and mortality in stratified analysis (n=34,161).

|                            |                                  | Yogurt intake frequency |                  |                  |                             | <i>P</i> -trend <sup>β</sup> | <i>P</i> -interaction <sup>γ</sup> |
|----------------------------|----------------------------------|-------------------------|------------------|------------------|-----------------------------|------------------------------|------------------------------------|
|                            |                                  | Almost never            | 1-2 times/mo     | 1-2 times/wk     | 3 times/wk/<br>Almost daily |                              |                                    |
| <b>Men</b>                 |                                  |                         |                  |                  |                             |                              |                                    |
| <b>All-cause mortality</b> |                                  |                         |                  |                  |                             |                              |                                    |
| Age                        | <50 y (n=8,116)                  | 1.00 ( <i>ref.</i> )    | 0.81 (0.69-0.95) | 0.81 (0.66-0.99) | 1.23 (0.97-1.56)            | 0.579                        | 0.747                              |
|                            | ≥50 y (n=8,449)                  | 1.00 ( <i>ref.</i> )    | 0.91 (0.84-1.00) | 0.90 (0.80-1.01) | 0.98 (0.86-1.12)            | 0.129                        |                                    |
| BMI                        | <25 kg/m <sup>2</sup> (n=11,598) | 1.00 ( <i>ref.</i> )    | 0.91 (0.86-1.03) | 0.94 (0.83-1.06) | 1.06 (0.93-1.21)            | 0.912                        | 0.146                              |
|                            | ≥25 kg/m <sup>2</sup> (n=4,483)  | 1.00 ( <i>ref.</i> )    | 0.81 (0.70-0.95) | 0.82 (0.68-1.00) | 0.93 (0.72-1.20)            | 0.041                        |                                    |
| Currently smoking          | No (n=6,310)                     | 1.00 ( <i>ref.</i> )    | 0.98 (0.86-1.11) | 0.96 (0.82-1.14) | 1.15 (0.96-1.38)            | 0.414                        | 0.020                              |
|                            | Yes (n=9,989)                    | 1.00 ( <i>ref.</i> )    | 0.88 (0.80-0.97) | 0.86 (0.75-0.98) | 0.95 (0.81-1.10)            | 0.022                        |                                    |
| <b>Cancer mortality</b>    |                                  |                         |                  |                  |                             |                              |                                    |
| Age                        | <50 y (n=8,116)                  | 1.00 ( <i>ref.</i> )    | 0.68 (0.52-0.88) | 0.88 (0.65-1.21) | 1.15 (0.78-1.71)            | 0.551                        | 0.650                              |
|                            | ≥50 y (n=8,449)                  | 1.00 ( <i>ref.</i> )    | 0.96 (0.84-1.10) | 0.97 (0.81-1.17) | 0.99 (0.80-1.23)            | 0.759                        |                                    |
| BMI                        | <25 kg/m <sup>2</sup> (n=11,598) | 1.00 ( <i>ref.</i> )    | 0.92 (0.80-1.06) | 1.06 (0.88-1.27) | 0.98 (0.79-1.22)            | 0.966                        | 0.715                              |
|                            | ≥25 kg/m <sup>2</sup> (n=4,483)  | 1.00 ( <i>ref.</i> )    | 0.86 (0.67-1.10) | 0.81 (0.58-1.12) | 1.12 (0.76-1.65)            | 0.549                        |                                    |
| Currently smoking          | No (n=6,310)                     | 1.00 ( <i>ref.</i> )    | 1.04 (0.84-1.29) | 0.98 (0.75-1.28) | 1.09 (0.79-1.48)            | 0.740                        | 0.238                              |
|                            | Yes (n=9,989)                    | 1.00 ( <i>ref.</i> )    | 0.85 (0.73-0.99) | 0.96 (0.79-1.17) | 0.96 (0.75-1.22)            | 0.351                        |                                    |
| <b>CVD mortality</b>       |                                  |                         |                  |                  |                             |                              |                                    |
| Age                        | <50 y (n=8,116)                  | 1.00 ( <i>ref.</i> )    | 0.80 (0.58-1.11) | 0.68 (0.43-1.08) | 1.11 (0.67-1.86)            | 0.349                        | 0.636                              |
|                            | ≥50 y (n=8,449)                  | 1.00 ( <i>ref.</i> )    | 0.94 (0.79-1.13) | 0.95 (0.77-1.21) | 0.95 (0.72-1.25)            | 0.583                        |                                    |
| BMI                        | <25 kg/m <sup>2</sup> (n=11,598) | 1.00 ( <i>ref.</i> )    | 0.97 (0.80-1.17) | 0.89 (0.69-1.16) | 0.97 (0.73-1.30)            | 0.522                        | 0.504                              |
|                            | ≥25 kg/m <sup>2</sup> (n=4,483)  | 1.00 ( <i>ref.</i> )    | 0.88 (0.66-1.19) | 1.01 (0.71-1.44) | 1.06 (0.66-1.70)            | 0.970                        |                                    |
| Currently smoking          | No (n=6,310)                     | 1.00 ( <i>ref.</i> )    | 0.98 (0.75-1.29) | 1.09 (0.79-1.51) | 1.23 (0.86-1.77)            | 0.283                        | 0.015                              |
|                            | Yes (n=9,989)                    | 1.00 ( <i>ref.</i> )    | 0.93 (0.77-1.13) | 0.83 (0.64-1.09) | 0.80 (0.56-1.12)            | 0.073                        |                                    |
| <b>Women</b>               |                                  |                         |                  |                  |                             |                              |                                    |
| <b>All-cause mortality</b> |                                  |                         |                  |                  |                             |                              |                                    |
| Age                        | <50 y (n=7,942)                  | 1.00 ( <i>ref.</i> )    | 1.00 (0.80-1.26) | 1.02 (0.80-1.29) | 1.11 (0.85-1.45)            | 0.500                        | 0.062                              |
|                            | ≥50 y (n=9,654)                  | 1.00 ( <i>ref.</i> )    | 0.87 (0.77-0.97) | 0.90 (0.80-1.01) | 0.84 (0.73-0.96)            | 0.009                        |                                    |
| BMI                        | <25 kg/m <sup>2</sup> (n=12,000) | 1.00 ( <i>ref.</i> )    | 0.92 (0.81-1.05) | 0.95 (0.83-1.09) | 0.92 (0.79-1.07)            | 0.288                        | 0.731                              |
|                            | ≥25 kg/m <sup>2</sup> (n=5,122)  | 1.00 ( <i>ref.</i> )    | 0.94 (0.79-1.12) | 0.96 (0.79-1.16) | 0.94 (0.76-1.15)            | 0.517                        |                                    |
| Currently smoking          | No (n=13,629)                    | 1.00 ( <i>ref.</i> )    | 0.92 (0.81-1.04) | 0.91 (0.81-1.04) | 0.92 (0.79-1.06)            | 0.143                        | 0.479                              |
|                            | Yes (n=1,195)                    | 1.00 ( <i>ref.</i> )    | 0.89 (0.62-1.29) | 1.16 (0.79-1.71) | 0.96 (0.61-1.50)            | 0.821                        |                                    |
| <b>Cancer mortality</b>    |                                  |                         |                  |                  |                             |                              |                                    |
| Age                        | <50 y (n=7,942)                  | 1.00 ( <i>ref.</i> )    | 1.23 (0.85-1.79) | 0.99 (0.66-1.48) | 1.42 (0.92-2.20)            | 0.304                        | 0.534                              |
|                            | ≥50 y (n=9,654)                  | 1.00 ( <i>ref.</i> )    | 0.89 (0.72-1.09) | 0.97 (0.78-1.20) | 1.00 (0.79-1.26)            | 0.971                        |                                    |
| BMI                        | <25 kg/m <sup>2</sup> (n=12,000) | 1.00 ( <i>ref.</i> )    | 0.97 (0.78-1.22) | 0.93 (0.73-1.18) | 1.08 (0.84-1.39)            | 0.790                        | 0.349                              |
|                            | ≥25 kg/m <sup>2</sup> (n=5,122)  | 1.00 ( <i>ref.</i> )    | 1.12 (0.82-1.52) | 1.12 (0.80-1.56) | 1.21 (0.85-1.72)            | 0.295                        |                                    |
| Currently smoking          | No (n=13,629)                    | 1.00 ( <i>ref.</i> )    | 0.97 (0.78-1.19) | 1.02 (0.82-1.27) | 1.12 (0.89-1.42)            | 0.366                        | 0.770                              |
|                            | Yes (n=1,195)                    | 1.00 ( <i>ref.</i> )    | 1.19 (0.62-2.28) | 0.97 (0.44-2.13) | 1.30 (0.57-2.95)            | 0.659                        |                                    |

**CVD mortality**

|                   |                                  |                      |                  |                  |                  |       |       |
|-------------------|----------------------------------|----------------------|------------------|------------------|------------------|-------|-------|
| Age               | <50 y (n=7,942)                  | 1.00 ( <i>ref.</i> ) | 0.56 (0.33-0.97) | 0.90 (0.54-1.48) | 0.92 (0.52-1.62) | 0.978 | 0.278 |
|                   | ≥50 y (n=9,654)                  | 1.00 ( <i>ref.</i> ) | 0.98 (0.79-1.21) | 0.86 (0.68-1.09) | 0.80 (0.62-1.05) | 0.069 |       |
| BMI               | <25 kg/m <sup>2</sup> (n=12,000) | 1.00 ( <i>ref.</i> ) | 0.94 (0.72-1.22) | 0.97 (0.74-1.28) | 0.94 (0.69-1.27) | 0.697 | 0.402 |
|                   | ≥25 kg/m <sup>2</sup> (n=5,122)  | 1.00 ( <i>ref.</i> ) | 0.87 (0.63-1.20) | 0.83 (0.58-1.19) | 0.77 (0.51-1.15) | 0.152 |       |
| Currently smoking | No (n=13,629)                    | 1.00 ( <i>ref.</i> ) | 0.91 (0.71-1.16) | 0.90 (0.70-1.16) | 0.88 (0.66-1.17) | 0.302 | 0.912 |
|                   | Yes (n=1,195)                    | 1.00 ( <i>ref.</i> ) | 1.18 (0.63-2.21) | 1.21 (0.60-2.44) | 0.37 (0.13-1.01) | 0.172 |       |

<sup>a</sup>Hazard ratios (HRs) and 95% confidence intervals (95% CIs) were calculated by Cox proportional hazards models.

<sup>β</sup> *P*-trend was calculated by treating exposure as a continuous variable.

<sup>γ</sup>Model 1 was adjusted for age (continuous), education level (junior high school or lower, high school, college or higher, or missing), BMI (<18.5 kg/m<sup>2</sup>, 18.5-24.9 kg/m<sup>2</sup>, ≥25.0 kg/m<sup>2</sup>, or missing), smoking status (never, former, <20 cigarettes/d, ≥20 cigarettes/d, or missing), alcohol drinking status (current, never, former, or missing), history of hypertension (yes, or no), history of diabetes (yes, or no), energy intake (sex-specific tertiles or missing), fish intake (sex-specific tertiles or missing), and vegetable and fruit intake (sex-specific tertiles or missing) except the stratified variable.

e-Table 8. Association between cheese intake and mortality in stratified analysis (n=34,161).

|                            |                                  | Cheese intake frequency |                  |                  |                             | P-trend <sup>β</sup> | P-interaction <sup>γ</sup> |
|----------------------------|----------------------------------|-------------------------|------------------|------------------|-----------------------------|----------------------|----------------------------|
|                            |                                  | Almost never            | 1-2 times/mo     | 1-2 times/wk     | 3 times/wk/<br>Almost daily |                      |                            |
| <b>Men</b>                 |                                  |                         |                  |                  |                             |                      |                            |
| <b>All-cause mortality</b> |                                  |                         |                  |                  |                             |                      |                            |
| Age                        | <50 y (n=8,116)                  | 1.00 ( <i>ref.</i> )    | 0.93 (0.81-1.06) | 0.96 (0.79-1.16) | 0.99 (0.72-1.36)            | 0.572                | 0.939                      |
|                            | ≥50 y (n=8,449)                  | 1.00 ( <i>ref.</i> )    | 0.87 (0.81-0.95) | 0.94 (0.84-1.05) | 1.08 (0.92-1.27)            | 0.361                |                            |
| BMI                        | <25 kg/m <sup>2</sup> (n=11,598) | 1.00 ( <i>ref.</i> )    | 0.88 (0.81-0.96) | 0.97 (0.86-1.08) | 1.07 (0.91-1.27)            | 0.553                | 0.973                      |
|                            | ≥25 kg/m <sup>2</sup> (n=4,483)  | 1.00 ( <i>ref.</i> )    | 0.93 (0.82-1.06) | 0.92 (0.75-1.13) | 1.03 (0.76-1.41)            | 0.511                |                            |
| Currently smoking          | No (n=6,310)                     | 1.00 ( <i>ref.</i> )    | 0.93 (0.82-1.05) | 0.96 (0.81-1.14) | 1.02 (0.79-1.31)            | 0.643                | 0.973                      |
|                            | Yes (n=9,989)                    | 1.00 ( <i>ref.</i> )    | 0.88 (0.81-0.96) | 0.96 (0.85-1.08) | 1.04 (0.87-1.25)            | 0.364                |                            |
| <b>Cancer mortality</b>    |                                  |                         |                  |                  |                             |                      |                            |
| Age                        | <50 y (n=8,116)                  | 1.00 ( <i>ref.</i> )    | 1.03 (0.83-1.27) | 1.00 (0.73-1.37) | 0.78 (0.43-1.41)            | 0.693                | 0.231                      |
|                            | ≥50 y (n=8,449)                  | 1.00 ( <i>ref.</i> )    | 1.00 (0.88-1.13) | 1.17 (0.99-1.39) | 1.16 (0.90-1.50)            | 0.080                |                            |
| BMI                        | <25 kg/m <sup>2</sup> (n=11,598) | 1.00 ( <i>ref.</i> )    | 1.01 (0.89-1.15) | 1.24 (1.05-1.47) | 1.17 (0.90-1.52)            | 0.027                | 0.259                      |
|                            | ≥25 kg/m <sup>2</sup> (n=4,483)  | 1.00 ( <i>ref.</i> )    | 1.02 (0.83-1.26) | 0.84 (0.60-1.19) | 1.08 (0.64-1.79)            | 0.720                |                            |
| Currently smoking          | No (n=6,310)                     | 1.00 ( <i>ref.</i> )    | 1.13 (0.93-1.38) | 1.14 (0.87-1.50) | 1.09 (0.71-1.65)            | 0.290                | 0.655                      |
|                            | Yes (n=9,989)                    | 1.00 ( <i>ref.</i> )    | 0.96 (0.84-1.09) | 1.15 (0.96-1.38) | 1.06 (0.79-1.41)            | 0.338                |                            |
| <b>CVD mortality</b>       |                                  |                         |                  |                  |                             |                      |                            |
| Age                        | <50 y (n=8,116)                  | 1.00 ( <i>ref.</i> )    | 0.94 (0.71-1.24) | 0.86 (0.56-1.30) | 0.93 (0.47-1.85)            | 0.498                | 0.888                      |
|                            | ≥50 y (n=8,449)                  | 1.00 ( <i>ref.</i> )    | 0.79 (0.67-0.93) | 0.85 (0.67-1.07) | 1.04 (0.75-1.43)            | 0.155                |                            |
| BMI                        | <25 kg/m <sup>2</sup> (n=11,598) | 1.00 ( <i>ref.</i> )    | 0.77 (0.65-0.91) | 0.86 (0.67-1.09) | 0.93 (0.65-1.33)            | 0.081                | 0.285                      |
|                            | ≥25 kg/m <sup>2</sup> (n=4,483)  | 1.00 ( <i>ref.</i> )    | 1.00 (0.78-1.28) | 0.84 (0.55-1.27) | 1.21 (0.69-2.10)            | 0.924                |                            |
| Currently smoking          | No (n=6,310)                     | 1.00 ( <i>ref.</i> )    | 0.87 (0.68-1.11) | 1.04 (0.75-1.44) | 0.83 (0.48-1.44)            | 0.588                | 0.559                      |
|                            | Yes (n=9,989)                    | 1.00 ( <i>ref.</i> )    | 0.82 (0.69-0.98) | 0.76 (0.59-1.00) | 1.03 (0.72-1.46)            | 0.093                |                            |
| <b>Women</b>               |                                  |                         |                  |                  |                             |                      |                            |
| <b>All-cause mortality</b> |                                  |                         |                  |                  |                             |                      |                            |
| Age                        | <50 y (n=7,942)                  | 1.00 ( <i>ref.</i> )    | 1.03 (0.84-1.25) | 1.00 (0.78-1.29) | 0.95 (0.63-1.45)            | 0.928                | 0.160                      |
|                            | ≥50 y (n=9,654)                  | 1.00 ( <i>ref.</i> )    | 0.84 (0.75-0.93) | 0.81 (0.70-0.93) | 0.87 (0.71-1.07)            | 0.001                |                            |
| BMI                        | <25 kg/m <sup>2</sup> (n=12,000) | 1.00 ( <i>ref.</i> )    | 0.94 (0.83-1.05) | 0.89 (0.76-1.04) | 0.88 (0.70-1.10)            | 0.077                | 0.839                      |
|                            | ≥25 kg/m <sup>2</sup> (n=5,122)  | 1.00 ( <i>ref.</i> )    | 0.83 (0.71-0.98) | 0.84 (0.67-1.06) | 0.92 (0.66-1.29)            | 0.089                |                            |
| Currently smoking          | No (n=13,629)                    | 1.00 ( <i>ref.</i> )    | 0.89 (0.80-1.00) | 0.83 (0.71-0.96) | 0.91 (0.73-1.13)            | 0.016                | 0.401                      |
|                            | Yes (n=1,195)                    | 1.00 ( <i>ref.</i> )    | 1.06 (0.77-1.47) | 0.93 (0.60-1.45) | 0.95 (0.50-1.78)            | 0.807                |                            |
| <b>Cancer mortality</b>    |                                  |                         |                  |                  |                             |                      |                            |
| Age                        | <50 y (n=7,942)                  | 1.00 ( <i>ref.</i> )    | 1.22 (0.89-1.68) | 1.24 (0.82-1.85) | 0.96 (0.46-1.85)            | 0.440                | 0.353                      |
|                            | ≥50 y (n=9,654)                  | 1.00 ( <i>ref.</i> )    | 0.86 (0.71-1.04) | 0.94 (0.74-1.20) | 0.95 (0.65-1.34)            | 0.441                |                            |
| BMI                        | <25 kg/m <sup>2</sup> (n=12,000) | 1.00 ( <i>ref.</i> )    | 0.95 (0.77-1.16) | 0.99 (0.77-1.28) | 1.03 (0.71-1.49)            | 0.999                | 0.998                      |
|                            | ≥25 kg/m <sup>2</sup> (n=5,122)  | 1.00 ( <i>ref.</i> )    | 0.99 (0.75-1.32) | 1.12 (0.77-1.62) | 0.69 (0.35-1.37)            | 0.756                |                            |
| Currently smoking          | No (n=13,629)                    | 1.00 ( <i>ref.</i> )    | 0.92 (0.76-1.11) | 1.02 (0.80-1.29) | 1.07 (0.75-1.52)            | 0.864                | 0.480                      |
|                            | Yes (n=1,195)                    | 1.00 ( <i>ref.</i> )    | 1.16 (0.64-2.11) | 0.95 (0.40-2.29) | 0.60 (0.14-1.14)            | 0.684                |                            |

**CVD mortality**

|                   |                                  |                      |                  |                  |                  |       |       |
|-------------------|----------------------------------|----------------------|------------------|------------------|------------------|-------|-------|
| Age               | <50 y (n=7,942)                  | 1.00 ( <i>ref.</i> ) | 0.99 (0.63-1.56) | 1.31 (0.78-2.22) | 1.50 (0.69-3.27) | 0.224 | 0.041 |
|                   | ≥50 y (n=9,654)                  | 1.00 ( <i>ref.</i> ) | 0.88 (0.71-1.08) | 0.80 (0.60-1.05) | 0.90 (0.61-1.33) | 0.123 |       |
| BMI               | <25 kg/m <sup>2</sup> (n=12,000) | 1.00 ( <i>ref.</i> ) | 1.05 (0.82-1.34) | 1.07 (0.79-1.45) | 0.99 (0.63-1.56) | 0.788 | 0.303 |
|                   | ≥25 kg/m <sup>2</sup> (n=5,122)  | 1.00 ( <i>ref.</i> ) | 0.72 (0.53-0.99) | 0.71 (0.45-1.12) | 1.00 (0.56-1.80) | 0.178 |       |
| Currently smoking | No (n=13,629)                    | 1.00 ( <i>ref.</i> ) | 0.90 (0.72-1.13) | 0.99 (0.74-1.32) | 0.98 (0.64-1.52) | 0.789 | 0.311 |
|                   | Yes (n=1,195)                    | 1.00 ( <i>ref.</i> ) | 1.33 (0.73-2.41) | 1.24 (0.58-2.65) | 0.85 (0.28-2.65) | 0.821 |       |

<sup>a</sup>Hazard ratios (HRs) and 95% confidence intervals (95% CIs) were calculated by Cox proportional hazards models.

<sup>β</sup> *P*-trend was calculated by treating exposure as a continuous variable.

<sup>γ</sup>Model 1 was adjusted for age (continuous), education level (junior high school or lower, high school, college or higher, or missing), BMI (<18.5 kg/m<sup>2</sup>, 18.5-24.9 kg/m<sup>2</sup>, ≥25.0 kg/m<sup>2</sup>, or missing), smoking status (never, former, <20 cigarettes/d, ≥20 cigarettes/d, or missing), alcohol drinking status (current, never, former, or missing), history of hypertension (yes, or no), history of diabetes (yes, or no), energy intake (sex-specific tertiles or missing), fish intake (sex-specific tertiles or missing), and vegetable and fruit intake (sex-specific tertiles or missing) except the stratified variable.



e-Table 9. Association between dairy intake and mortality after multiple imputation among men<sup>a</sup>

|                                  | Quartile of total dairy intake |                  |                  |                             | <i>P</i> -trend <sup>β</sup> |
|----------------------------------|--------------------------------|------------------|------------------|-----------------------------|------------------------------|
|                                  | Q1                             | Q2               | Q3               | Q4                          |                              |
| All-cause mortality <sup>γ</sup> | 1.00 ( <i>ref.</i> )           | 0.96 (0.89-1.04) | 0.98 (0.91-1.06) | 0.95 (0.88-1.02)            | 0.214                        |
| Cancer mortality <sup>γ</sup>    | 1.00 ( <i>ref.</i> )           | 0.99 (0.87-1.12) | 0.99 (0.88-1.12) | 0.95 (0.84-1.07)            | 0.421                        |
| CVD mortality <sup>γ</sup>       | 1.00 ( <i>ref.</i> )           | 0.89 (0.77-1.03) | 0.96 (0.83-1.11) | 0.90 (0.76-1.06)            | 0.385                        |
|                                  | Milk intake frequency          |                  |                  |                             |                              |
|                                  | Almost never/<br>1-2 times/mo  | 1-2 times/week   | 3-4 times/week   | Almost daily                |                              |
| All-cause mortality <sup>γ</sup> | 1.00 ( <i>ref.</i> )           | 0.97 (0.89-1.07) | 0.95 (0.87-1.03) | 0.97 (0.91-1.04)            | 0.462                        |
| Cancer mortality <sup>γ</sup>    | 1.00 ( <i>ref.</i> )           | 0.98 (0.84-1.13) | 1.01 (0.88-1.15) | 0.97 (0.87-1.07)            | 0.569                        |
| CVD mortality <sup>γ</sup>       | 1.00 ( <i>ref.</i> )           | 0.88 (0.75-1.04) | 0.92 (0.77-1.10) | 0.95 (0.83-1.09)            | 0.683                        |
|                                  | Yogurt intake frequency        |                  |                  |                             |                              |
|                                  | Almost never                   | 1-2 times/mo     | 1-2 times/wk     | 3 times/wk/<br>Almost daily |                              |
| All-cause mortality <sup>γ</sup> | 1.00 ( <i>ref.</i> )           | 0.93 (0.87-1.00) | 0.92 (0.83-1.02) | 1.02 (0.91-1.14)            | 0.303                        |
| Cancer mortality <sup>γ</sup>    | 1.00 ( <i>ref.</i> )           | 0.93 (0.83-1.05) | 0.99 (0.83-1.18) | 1.05 (0.90-1.23)            | 0.873                        |
| CVD mortality <sup>γ</sup>       | 1.00 ( <i>ref.</i> )           | 0.93 (0.79-1.08) | 0.90 (0.74-1.08) | 0.98 (0.74-1.30)            | 0.430                        |
|                                  | Cheese intake frequency        |                  |                  |                             |                              |
|                                  | Almost never                   | 1-2 times/mo     | 1-2 times/wk     | 3 times/wk/<br>Almost daily |                              |
| All-cause mortality <sup>γ</sup> | 1.00 ( <i>ref.</i> )           | 0.91 (0.85-0.98) | 0.97 (0.87-1.08) | 1.03 (0.91-1.17)            | 0.513                        |
| Cancer mortality <sup>γ</sup>    | 1.00 ( <i>ref.</i> )           | 0.99 (0.88-1.11) | 1.09 (0.93-1.27) | 1.08 (0.86-1.37)            | 0.314                        |
| CVD mortality <sup>γ</sup>       | 1.00 ( <i>ref.</i> )           | 0.89 (0.79-1.00) | 0.90 (0.77-1.05) | 1.02 (0.81-1.29)            | 0.269                        |

<sup>a</sup>Pooled hazard ratios (HRs) and 95% confidence intervals (95% CIs) were calculated by Cox proportional hazards models using five imputed datasets.

<sup>β</sup>P-trend was calculated using the median value of each category of total dairy intake and calculated by treating exposure as a continuous variable for subgroup dairy products frequency.

<sup>γ</sup>Adjusted for age (continuous), education level (junior high school or lower, high school, college or higher, or missing), BMI (<18.5kg/m<sup>2</sup>, 18.5-24.9 kg/m<sup>2</sup>, ≥25.0kg/m<sup>2</sup>, or missing), smoking status (never, former, <20 cigarettes/d, ≥20 cigarettes/d, or missing), alcohol drinking status (current, never, former, or missing), history of hypertension (yes, or no), history of diabetes (yes, or no), energy intake (sex-specific tertiles or missing), fish intake (sex-specific tertiles or missing), and vegetable and fruit intake (sex-specific tertiles or missing).

e-Table 10. Association between dairy intake and mortality after multiple imputation among women <sup>α</sup>

|                                  | Quartile of total dairy intake |                  |                  |                             | <i>P</i> -trend <sup>β</sup> |
|----------------------------------|--------------------------------|------------------|------------------|-----------------------------|------------------------------|
|                                  | Q1                             | Q2               | Q3               | Q4                          |                              |
| All-cause mortality <sup>γ</sup> | 1.00 ( <i>ref.</i> )           | 0.96 (0.87-1.07) | 0.98 (0.90-1.08) | 0.95 (0.86-1.04)            | 0.335                        |
| Cancer mortality <sup>γ</sup>    | 1.00 ( <i>ref.</i> )           | 0.90 (0.74-1.08) | 0.94 (0.79-1.13) | 0.96 (0.82-1.14)            | 0.816                        |
| CVD mortality <sup>γ</sup>       | 1.00 ( <i>ref.</i> )           | 1.00 (0.78-1.26) | 0.99 (0.79-1.23) | 0.88 (0.73-1.05)            | 0.173                        |
|                                  | Milk intake frequency          |                  |                  |                             |                              |
|                                  | Almost never/<br>1-2 times/mo  | 1-2 times/wk     | 3-4 times/wk     | Almost daily                |                              |
| All-cause mortality <sup>γ</sup> | 1.00 ( <i>ref.</i> )           | 1.02 (0.88-1.18) | 0.92 (0.82-1.04) | 0.96 (0.88-1.06)            | 0.279                        |
| Cancer mortality <sup>γ</sup>    | 1.00 ( <i>ref.</i> )           | 0.99 (0.80-1.24) | 0.82 (0.67-1.01) | 0.94 (0.81-1.11)            | 0.416                        |
| CVD mortality <sup>γ</sup>       | 1.00 ( <i>ref.</i> )           | 1.10 (0.87-1.40) | 0.99 (0.80-1.24) | 0.96 (0.81-1.14)            | 0.381                        |
|                                  | Yogurt intake frequency        |                  |                  |                             |                              |
|                                  | Almost never                   | 1-2 times/mo     | 1-2 times/wk     | 3 times/wk/<br>Almost daily |                              |
| All-cause mortality <sup>γ</sup> | 1.00 ( <i>ref.</i> )           | 0.93 (0.84-1.02) | 0.94 (0.86-1.03) | 0.94 (0.84-1.06)            | 0.226                        |
| Cancer mortality <sup>γ</sup>    | 1.00 ( <i>ref.</i> )           | 0.97 (0.84-1.13) | 0.98 (0.83-1.16) | 1.07 (0.90-1.27)            | 0.546                        |
| CVD mortality <sup>γ</sup>       | 1.00 ( <i>ref.</i> )           | 0.93 (0.76-1.13) | 0.91 (0.76-1.09) | 0.86 (0.67-1.10)            | 0.162                        |
|                                  | Cheese intake frequency        |                  |                  |                             |                              |
|                                  | Almost never                   | 1-2 times/mo     | 1-2 times/wk     | 3 times/wk/<br>Almost daily |                              |
| All-cause mortality <sup>γ</sup> | 1.00 ( <i>ref.</i> )           | 0.91 (0.84-0.99) | 0.91 (0.82-1.01) | 0.93 (0.78-1.11)            | 0.029                        |
| Cancer mortality <sup>γ</sup>    | 1.00 ( <i>ref.</i> )           | 0.96 (0.80-1.14) | 1.02 (0.86-1.21) | 0.94 (0.71-1.24)            | 0.780                        |
| CVD mortality <sup>γ</sup>       | 1.00 ( <i>ref.</i> )           | 0.92 (0.79-1.08) | 0.93 (0.72-1.20) | 1.03 (0.75-1.43)            | 0.671                        |

<sup>α</sup>Pooled hazard ratios (HRs) and 95% confidence intervals (95% CIs) were calculated by Cox proportional hazards models using five imputed datasets.

<sup>β</sup>*P*-trend was calculated using the median value of each category of total dairy intake and calculated by treating exposure as a continuous variable for subgroup dairy products frequency.

<sup>γ</sup>Adjusted for age (continuous), education level (junior high school or lower, high school, college or higher, or missing), BMI (<18.5kg/m<sup>2</sup>, 18.5-24.9 kg/m<sup>2</sup>, ≥25.0kg/m<sup>2</sup>, or missing), smoking status (never, former, <20 cigarettes/d, ≥20 cigarettes/d, or missing), alcohol drinking status (current, never, former, or missing), history of hypertension (yes, or no), history of diabetes (yes, or no), energy intake (sex-specific tertiles or missing), fish intake (sex-specific tertiles or missing), and vegetable and fruit intake (sex-specific tertiles or missing).
